# Supplementary material for: Engineering two-dimensional hybrid NaCl–organic coordinated nanoarchitectures on metal surfaces
Source: Royal Society of Chemistry journal article supplement (doi:10.1039/c5cc01892g), 2015-01-01
Supplement: c5cc01892g1.pdf [file c5cc01892g1.pdf]

## Engineering Two-Dimensional Hybrid NaCl-Organic Coordinated Nanoarchitectures on Metal Surface

Jérémy Hieulle,<sup>a</sup> David Peyrot,<sup>a</sup> Zhen Jiang,<sup>a</sup> and Fabien Silly\*,<sup>a</sup>

<sup>a</sup> CEA, IRAMIS, SPEC, TITANS, CNRS UMR 3680, F-91191 Gif sur Yvette, France. Fax: +33 16908 8446; Tel: +33 16908 8019; E-mail: [fabien.silly@cea.fr](mailto:fabien.silly@cea.fr)

### SUPPORTING INFORMATION

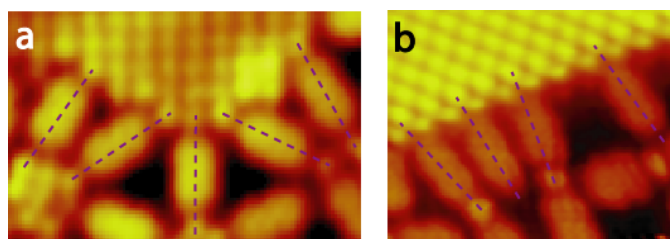

**Figure S1** : STM images of PTCDI - NaCl (100) island boundary. (a) NaCl single layer island  $V_s= 1.2$  V,  $I_t=0.6$  nA,  $5 \times 3$  nm<sup>2</sup>; (b) NaCl double-layer island,  $V_s= 1.3$  V,  $I_t=0.18$  nA,  $5 \times 4$  nm<sup>2</sup>. The molecular axis (dotted purple line) is superimposed to the STM image as a guide for the eyes.

The STM images suggest that NaCl is growing locally as a monolayer and double-layer films in the PTCDI domains. The STM images (Fig.S1) show that PTCDI molecules are aligned with the bright spots (position of Cl ions) of the NaCl single-layer island, Fig.S1(a). In contrast PTCDI molecules are aligned with the junction between two bright spots (position of Na ions in the NaCl second layer) of the NaCl double-layer island, Fig.S1(b). It therefore appears that in both case the PTCDI molecules are connected to a Cl ion of the NaCl first layer.
